# Supplementary material for: A New Low-Temperature Electrochemical Hydrocarbon and NOx Sensor
Source: MDPI journal article supplement (doi:10.3390/s17122759), 2017-11-29
Supplement: s1 [file s1]

## Supplemental Information

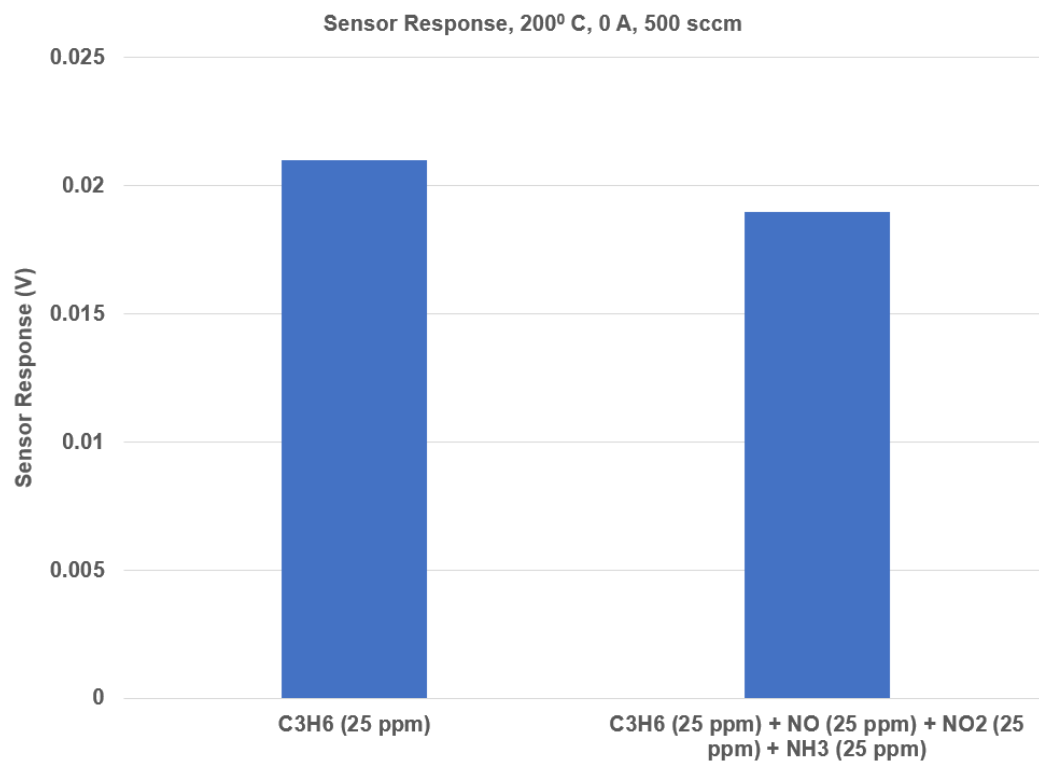

**Sfigure 1.** Open-circuit sensor response to 25 ppm of C<sub>3</sub>H<sub>6</sub> and a mixture of 25 ppm of C<sub>3</sub>H<sub>6</sub>, NO, NO<sub>2</sub> and NH<sub>3</sub>.

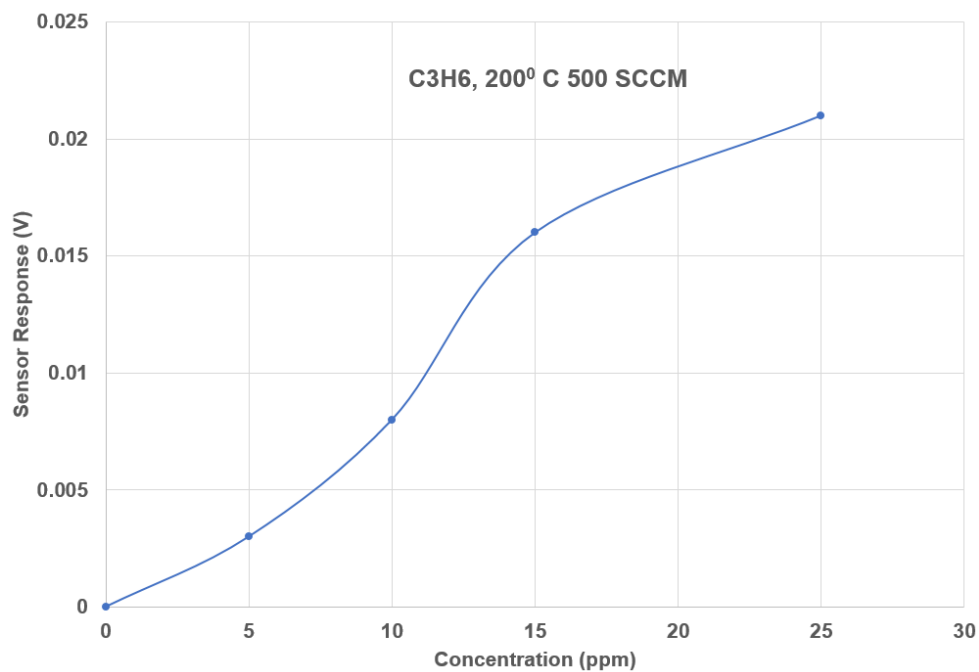

**Sfigure 2.** Open-circuit sensor response (sensitivity) to different concentrations of  $C_3H_6$

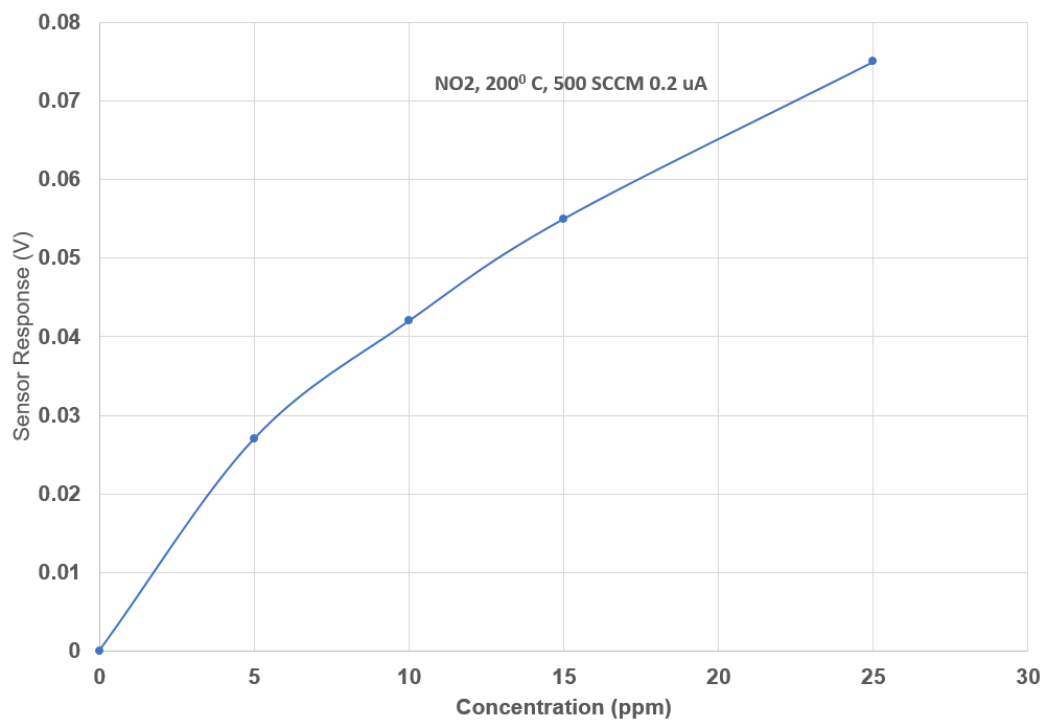

**Sfigure 3.** Biased sensor response (sensitivity) to different concentrations of  $NO_2$
